# Supplementary material for: Facile electrochemical affinity measurements of small and large molecules
Source: Royal Society of Chemistry journal article supplement (doi:10.1039/d3ra01029e), 2023-01-01
Supplement: d3ra01029e1.pdf [file d3ra01029e1.pdf]

## Supplementary Information

### **Facile electrochemical affinity measurements of small and large molecules**

Pouya Zaree,<sup>a</sup> Ilhan Tomris,<sup>a</sup> Sander D. de Vos,<sup>b</sup> Roosmarijn van der Woude,<sup>a</sup> Frits  
Flesch,<sup>a</sup> Robertus J. M. Klein Gebbink,<sup>b</sup> Robert P. de Vries,<sup>a</sup> and Roland J. Pieters\*<sup>a</sup>

<sup>a</sup>Department of Chemical Biology & Drug Discovery, Utrecht Institute for Pharmaceutical Sciences,  
Utrecht University, P.O.Box 80082, NL-3508 TB Utrecht, The Netherlands

<sup>b</sup>Organic Chemistry and Catalysis, Debye Institute for Nanomaterials Science, Utrecht University,  
Universiteitsweg 99, 3584 CG Utrecht, The Netherlands

# Binding to ConA

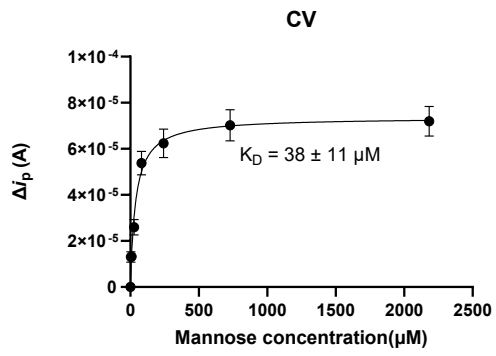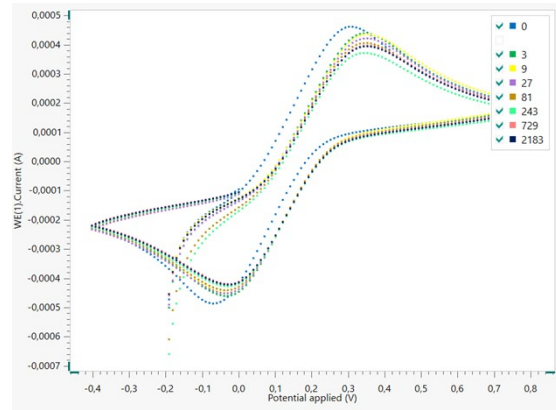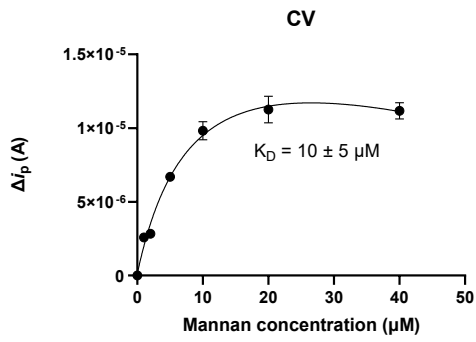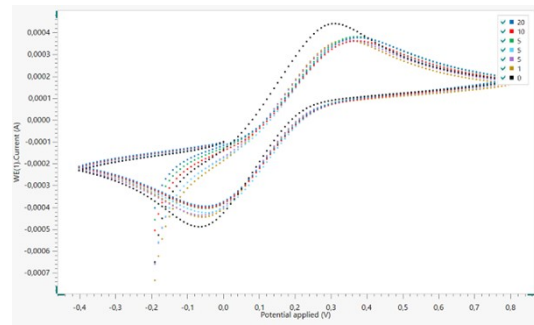

## Binding to LecA

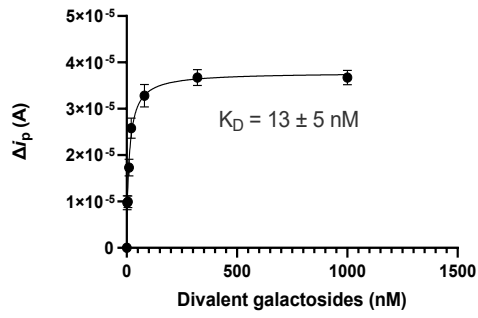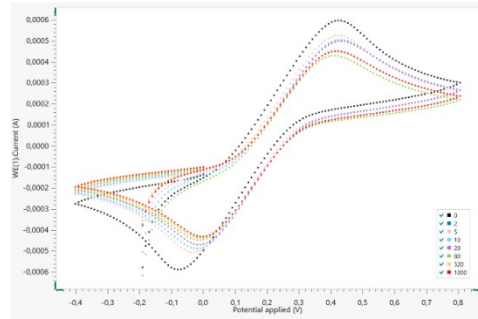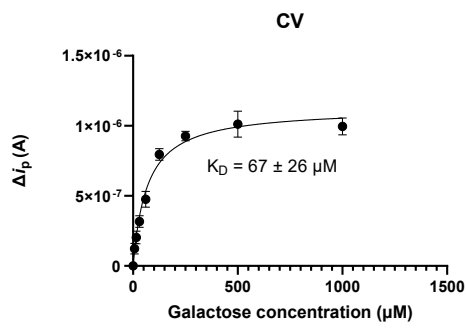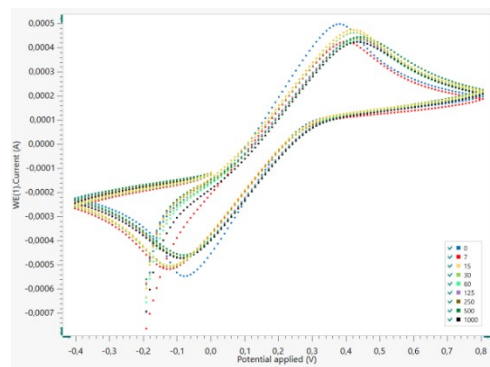

## Binding to Ace 2

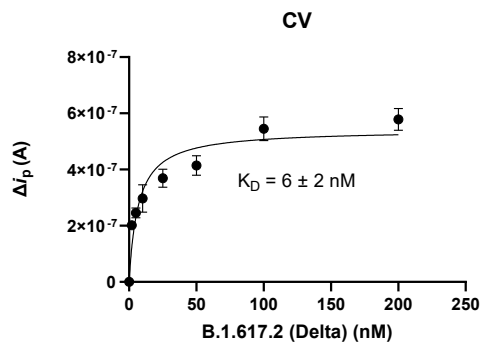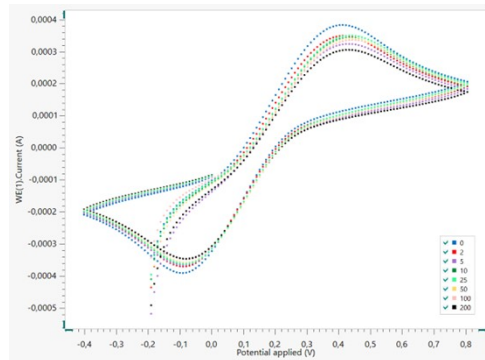

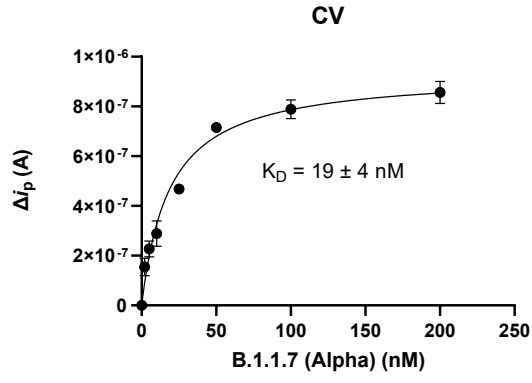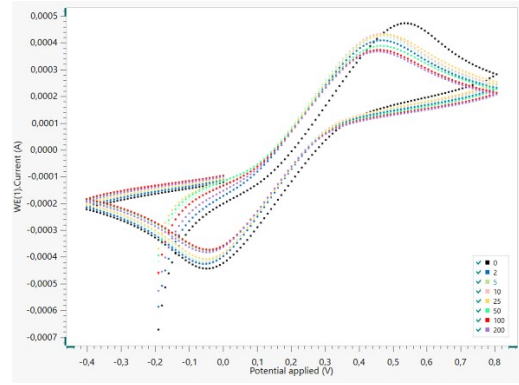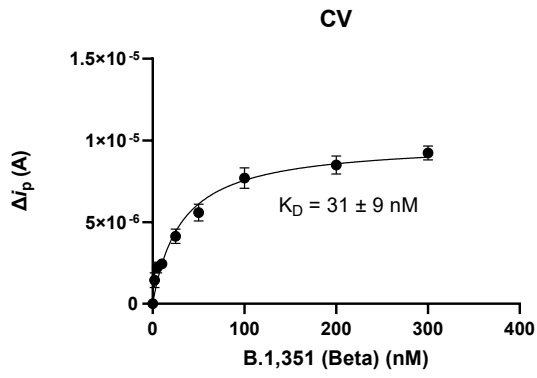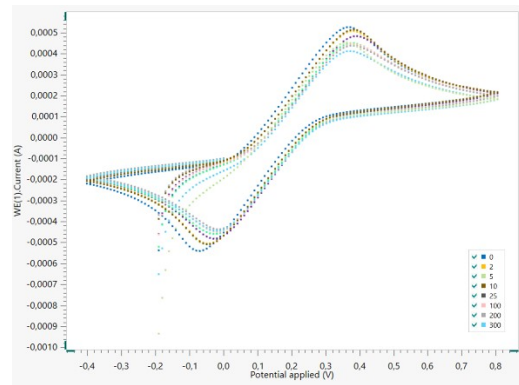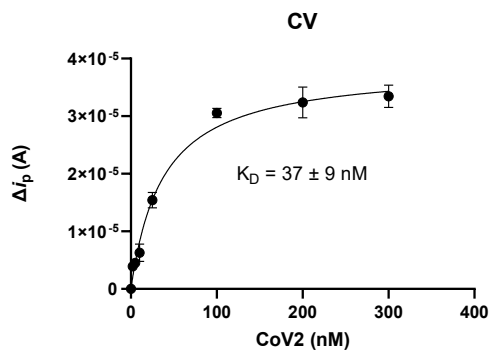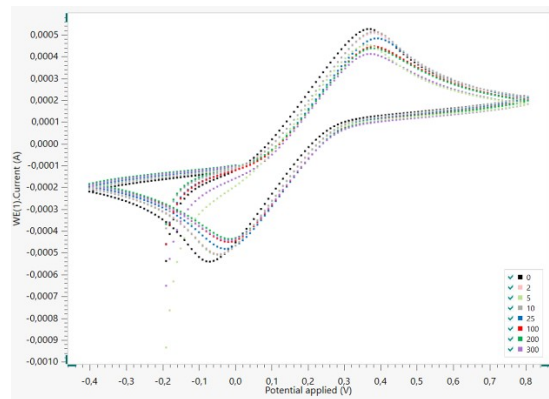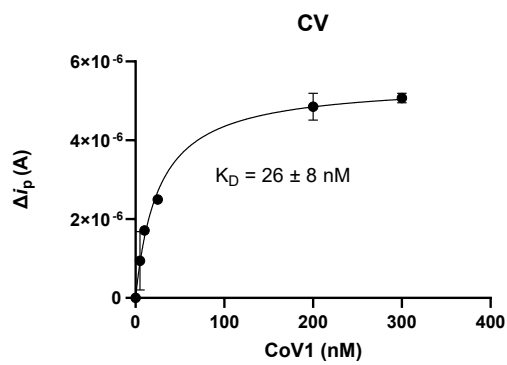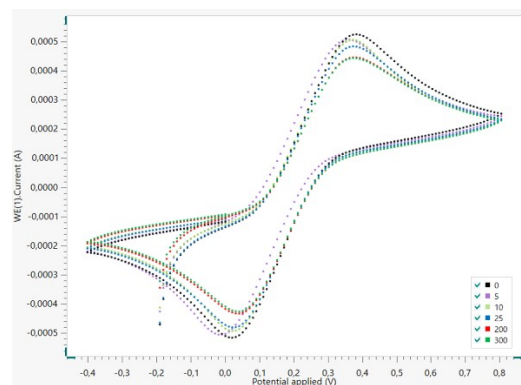

**Fig. S1.** CV responses of fabricated biosensors tested with different concentrations of inhibitors and its corresponding relationship between  $\Delta$  current and concentration of inhibitor.

## Binding to ConA

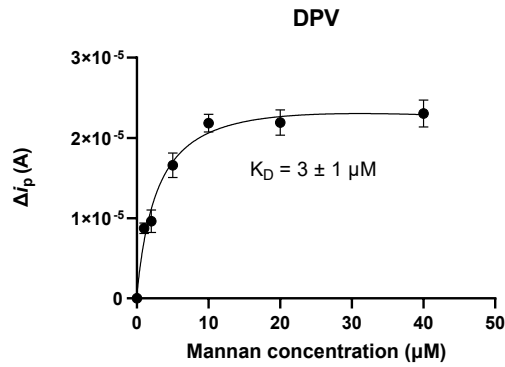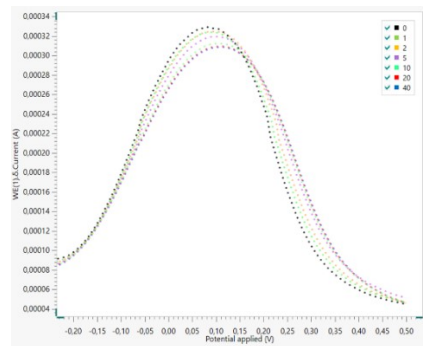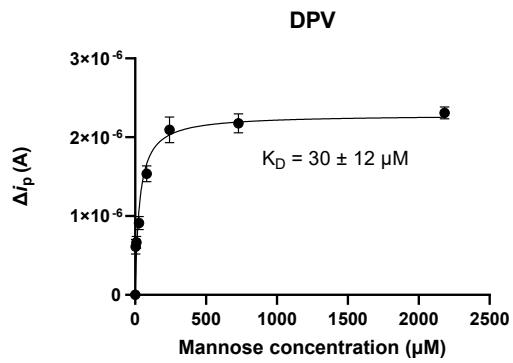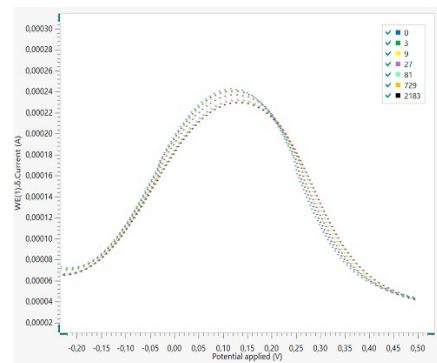

## Binding to LecA

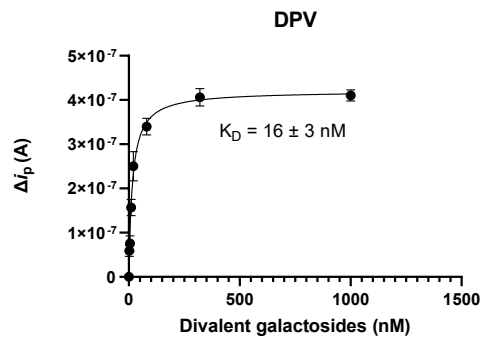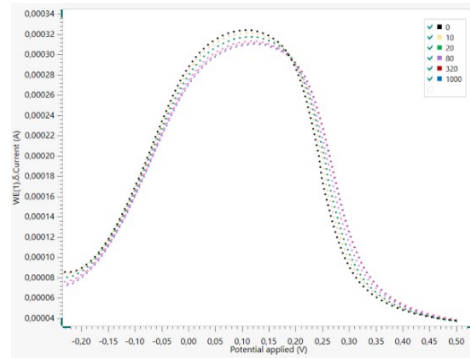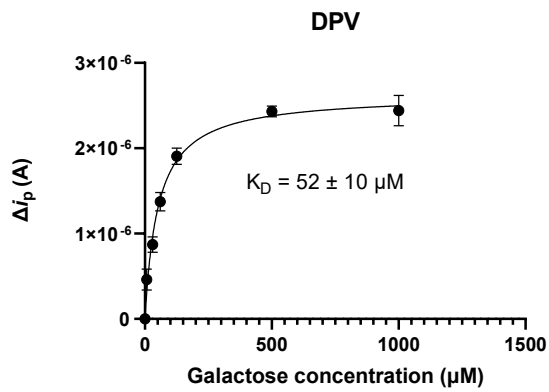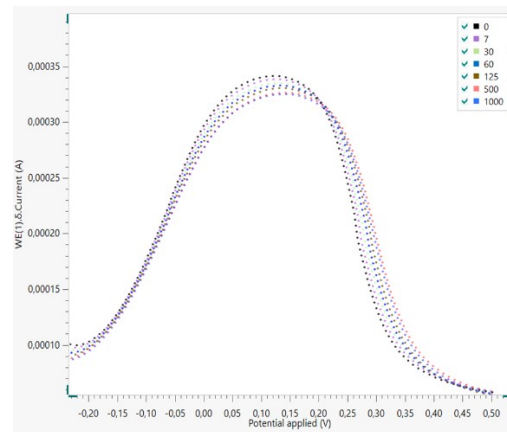

## Binding to ACE2

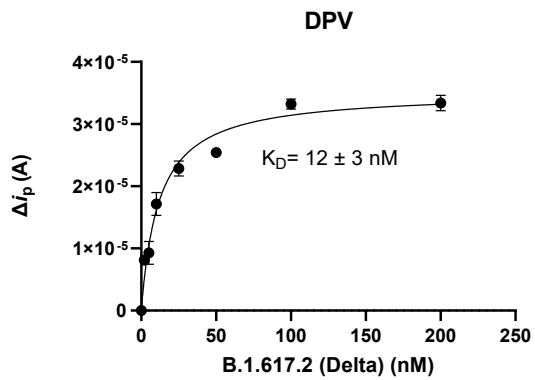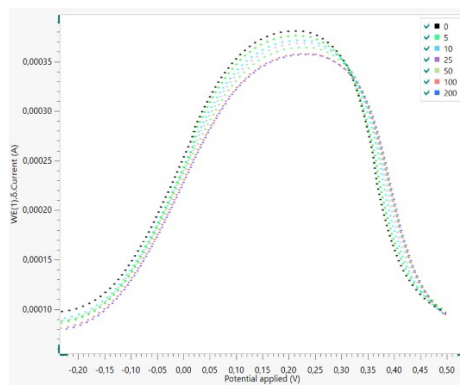

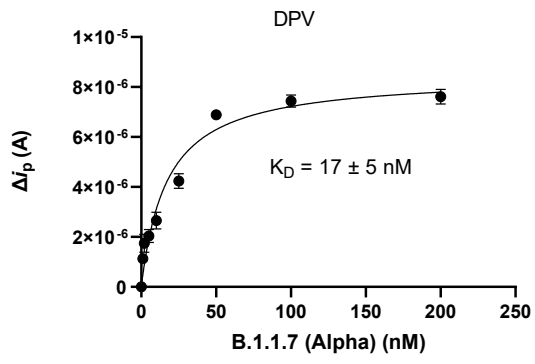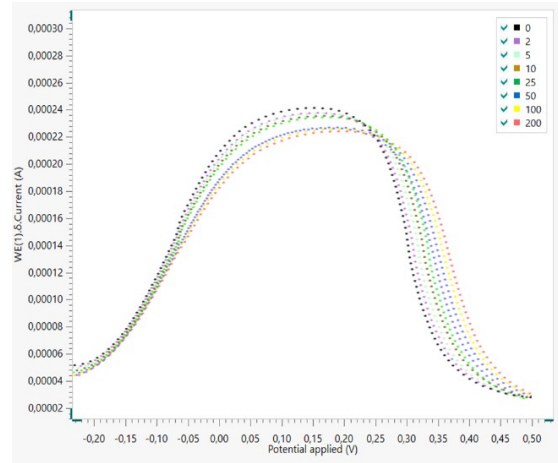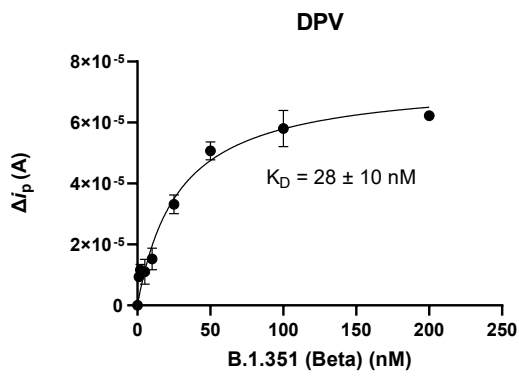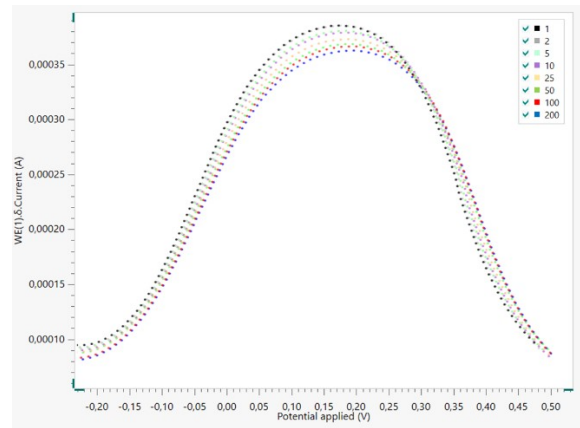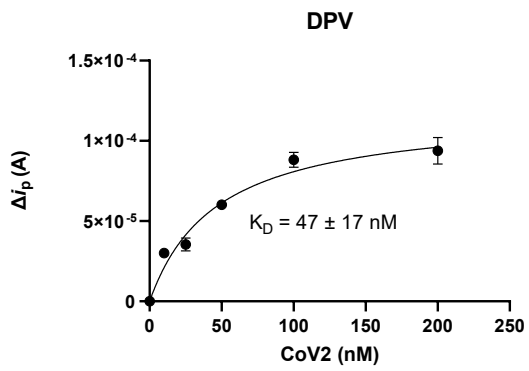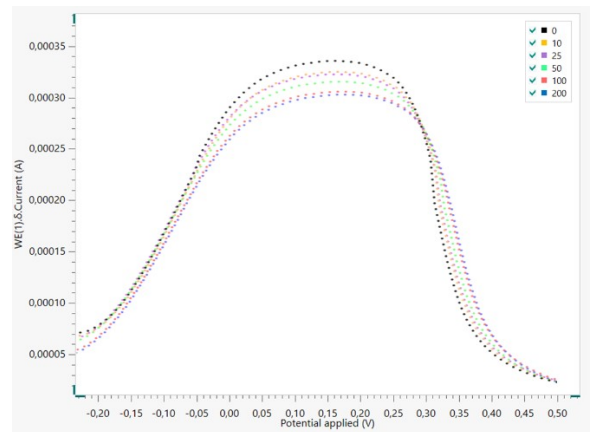

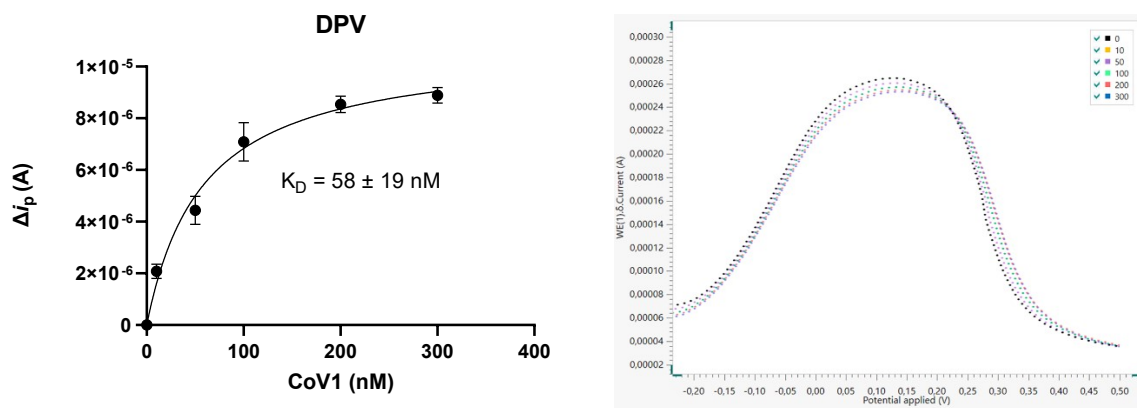

**Fig. S2.** DPV responses of fabricated biosensors tested with different concentrations of inhibitors and its corresponding relationship between  $\Delta$  current and concentration of inhibitor.
